# Supplementary material
Source: PubMed Central journal article supplement (PMC3226764)
Supplement: NIHMS333592-supplement-Supplementary_Text.pdf [file NIHMS333592-supplement-Supplementary_Text.pdf]

**SUPPLEMENTARY MATERIAL FOR “GENERAL MECHANISM OF  
ACTOMYOSIN CONTRACTILITY”**

**DERIVATION OF THEORETICAL WALL STRESS  $\sigma_{th}$**

Here we obtain an approximate expression for the stress on the fixed boundary of a two-dimensional actin network due to an active myosin minifilament, as shown in Fig.1a. We treat the minifilament as a force dipole. To simplify our calculations we consider a circular region and assume that the effect of the force dipole is equivalent to that of a uniform inward pressure  $P$  along a boundary at a radius  $a$  that is half the size of the force dipole (see Fig. 1b).. For generality, we first consider a layered system having two different elastic moduli inside and outside  $r = a$ :  $\kappa$ ,  $G$  from  $r = 0$  to  $r = a$  and  $\kappa^o$  and  $G^o$  from  $r = a$  to  $r = b$ ; later we will treat the myosin-actin system as a special case.

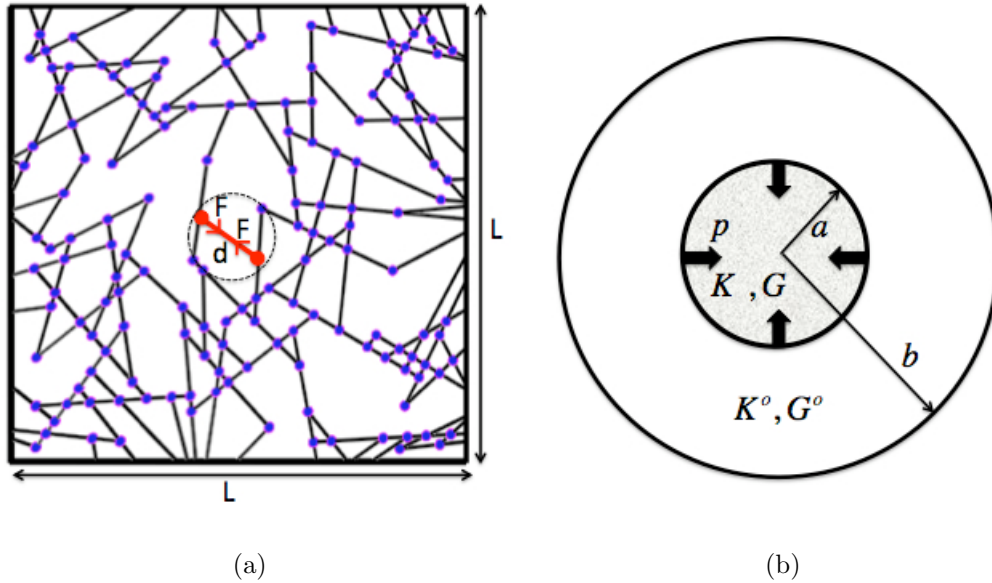

FIG. 1: (a) An actin network with a myosin minifilament (dumbbell) represented as a force dipole acting on the network. (b) Circularly layered system with different material properties in two regions. (Here  $a$  and  $b$  in (b) correspond to  $d/2$  and  $L/2$  in (a) respectively ).

The boundary conditions for the displacement  $U$  and the stress  $\sigma$  are as follows. Because of the assumption of a fixed boundary,  $U_r(r = b) = 0$ , and because there is no singularity at the origin,  $U_r(r = 0)$  is finite. Furthermore, because there are no gaps in the material,

TABLE I: **Notation Used**

|                    |                                             |
|--------------------|---------------------------------------------|
| $\kappa, \kappa^o$ | Bulk modulus of the material                |
| $G, G^o$           | Shear modulus of the material.              |
| $\vec{U}(\vec{r})$ | Displacement vector at position $r$         |
| $U_r$              | Radial component of the displacement vector |
| $\eta_{ij}$        | $ij^{th}$ component of the strain tensor    |
| $\sigma_{ij}$      | $ij^{th}$ component of the stress tensor    |

$U_r(r = a^+) = U_r(r = a^-)$ . Finally, the application the pressure at  $r = a$  leads to a discontinuity in  $\sigma$ , so that  $\sigma_{rr}(r = a^+) - \sigma_{rr}(r = a^-) = P$ .

To obtain the functional form of the solution, we note that circular symmetry and the absence of body forces imply that  $\vec{U}(\vec{r}) = U_r(r)\hat{r}$  and  $\vec{\nabla}(\vec{\nabla} \cdot \vec{U}) = 0$  in both regions. Thus the solution has the form  $U_r(r) = Ar + B/r$  for  $r < a$  and  $U_r(r) = Cr + D/r$  for  $a < r < b$ , where  $A, B, C$ , and  $D$  are constants to be determined. The boundary condition that  $U_r(r = 0)$  is finite implies that  $B = 0$ , and the condition that  $U_r(r = b) = 0$  implies that  $D = -Cb^2$ . Then the condition that  $U_r(r = a^+) = U_r(r = a^-)$  implies that  $Aa = C(a - b^2/a)$  so that  $A = -C(b^2/a^2 - 1)$ , and the solution becomes

$$U(r) = \begin{cases} -Cr(b^2/a^2 - 1) & \text{for } r < a \\ -Cr(b^2/r^2 - 1) & \text{for } a < r < b \end{cases}$$

To impose the boundary condition that  $\sigma_{rr}(r = a^+) - \sigma_{rr}(r = a^-) = P$ , we first calculate the strains, using the general result  $\eta_{rr} = \frac{\partial U_r}{\partial r}$ ,  $\eta_{\phi\phi} = \frac{U_r}{r}$  and  $\eta_{r\phi} = 0$  (Ref. [1]), Eq. (1.7):

$$\begin{aligned} \eta_{rr} &= -C(b^2/a^2 - 1), \eta_{\phi\phi} = -C(b^2/a^2 - 1) \quad (r < a) \\ \eta_{rr} &= C(b^2/r^2 + 1), \eta_{\phi\phi} = -C(b^2/r^2 - 1) \quad (a < r < b) \end{aligned} \quad (1)$$

The stress is given in terms of the strain as follows (Ref. [1], Eq. 4.6):

$$\begin{aligned} \sigma_{rr} &= (\kappa + \frac{4}{3}G)\eta_{rr} + (\kappa - \frac{2}{3}G)\eta_{\phi\phi} \\ \sigma_{\phi\phi} &= (\kappa + \frac{4}{3}G)\eta_{\phi\phi} + (\kappa - \frac{2}{3}G)\eta_{rr} \end{aligned} \quad (2)$$

Thus for  $r < a$

$$\begin{aligned}
\sigma_{rr} &= -2C\left(\kappa + \frac{G}{3}\right)\left(\frac{b^2}{a^2} - 1\right) \\
\sigma_{\phi\phi} &= -2C\left(\kappa + \frac{G}{3}\right)\left(\frac{b^2}{a^2} - 1\right)
\end{aligned} \tag{3}$$

and for  $a < r < b$

$$\begin{aligned}
\sigma_{rr} &= 2C\left[\kappa^o + \left(\frac{1}{3} + \frac{b^2}{r^2}\right)G^o\right] \\
\sigma_{rr} &= 2C\left[\kappa^o + \left(\frac{1}{3} - \frac{b^2}{r^2}\right)G^o\right]
\end{aligned} \tag{4}$$

Then the stress boundary condition,  $\sigma_{rr}(r = a^+) - \sigma_{rr}(r = a^-) = P$ , implies that

$$2C\left[\kappa^o + \left(\frac{1}{3} + \frac{b^2}{a^2}\right)G^o\right] + 2C\left(\kappa + \frac{G}{3}\right)\left(\frac{b^2}{a^2} - 1\right) = P \tag{5}$$

so that

$$C = \frac{P}{2\left[\kappa^o + \left(\frac{1}{3} + \frac{b^2}{a^2}\right)G^o + \left(\kappa + \frac{G}{3}\right)\left(\frac{b^2}{a^2} - 1\right)\right]} \tag{6}$$

Finally, for  $a < r < b$  we have

$$\sigma_{rr} = \frac{[\kappa^o + \left(\frac{1}{3} + \frac{b^2}{r^2}\right)G^o]P}{[\kappa^o + \left(\frac{1}{3} + \frac{b^2}{a^2}\right)G^o + \left(\kappa + \frac{G}{3}\right)\left(\frac{b^2}{a^2} - 1\right)]} \tag{7}$$

We now assume that the two regions consist of the same material, so that  $\kappa^o = \kappa$ . Furthermore, for actin networks, Poisson's ratio is close to 0.5 [2], so that we take  $G^o = G = 0$ . Finally, we assume that  $b \gg a$ . Then we obtain at  $r = a$

$$\sigma_{rr} \simeq \frac{Pa^2}{b^2} \tag{8}$$

For the geometry of Fig.1a, we have  $a = d/2$ ,  $b = L/2$ . Since the magnitude of the contraction induced by a force distribution  $f_{vec}(\vec{r})$  is measured by its force dipole moment  $\int \vec{r} \cdot f_{vec}(\vec{r}) d^3r$ , we choose the value of  $P$  to have the same dipole  $-Fd$  as the pair of myosin forces. Since the force density associated with  $P$  is  $-\hat{r}P\delta(r-a)$ , we obtain  $-2\pi Pa^2 = -Fd$ , so  $P = \frac{2F}{\pi d}$ . Thus

$$\sigma_{th} = \frac{Fd}{2\pi(L/2)^2} \tag{9}$$

- 
- [1] L. D. Landau and E. M. Lifshitz, *Theory of Elasticity* (Pergamon press, New York, 1986), chapter 1, 3rd ed.
- [2] M. L. Gardel, M. T. Valentine, J. C. Crocker, A. R. Bausch, and D. A. Weitz, *Phys. Rev. Lett.* **91**, 158302 (2003).
